# Supplementary material for: Analysis of Sugarcane Juice Quality Indexes
Source: Hindawi journal article supplement (doi:10.1155/2017/1746982), 2017-01-01
Supplement: f1 [file 1746982.f1.pdf]

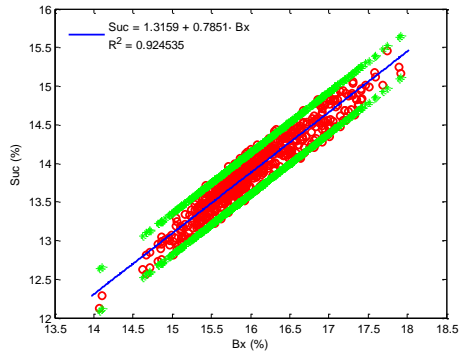

Predicting equation (1). *One dimensional linear regression of brix on sucrose content.*

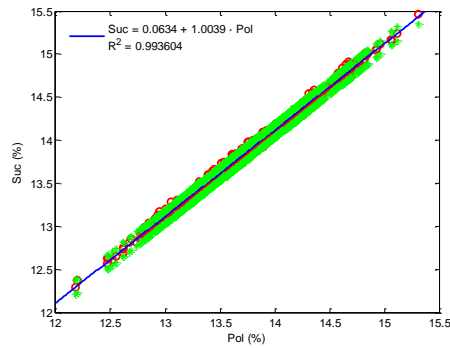

Predicting equation (2). *One dimensional linear regression of polarization on sucrose content.*

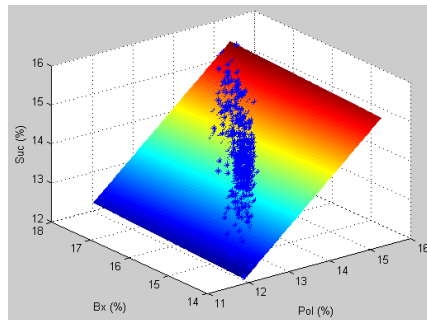

Predicting equation (4). *3D response surface of the detected data (polarization, brix and sucrose content).*

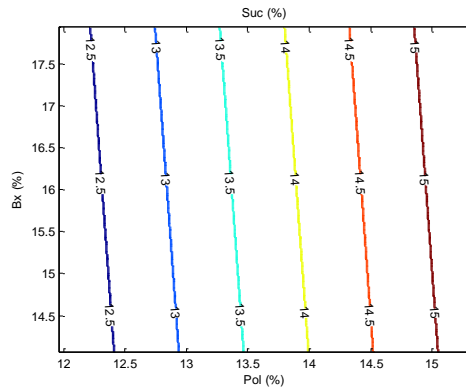

Predicting equation (4). *Contour plot between polarization and brix.*

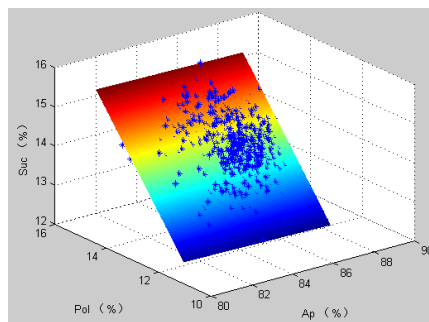

Predicting equation (5). *3D response surface of the detected data (apparent purity, polarization and sucrose content).*

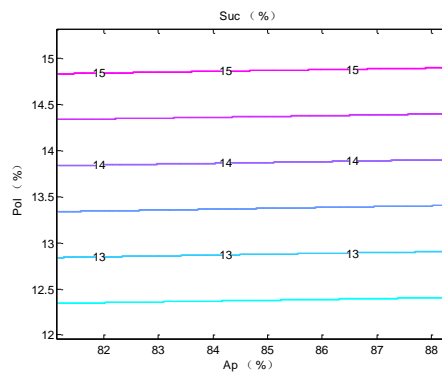

Predicting equation (5). *Contour plot between apparent purity and polarization.*

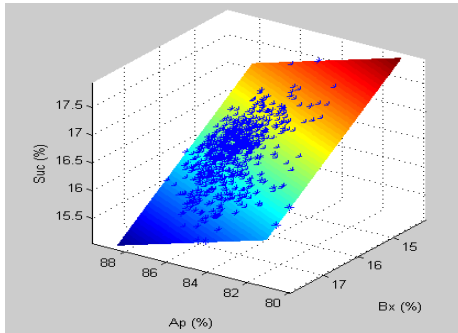

Predicting equation (6). 3D response surface of the detected data (apparent purity, brix and sucrose content ) at polarization = 15.31 %.

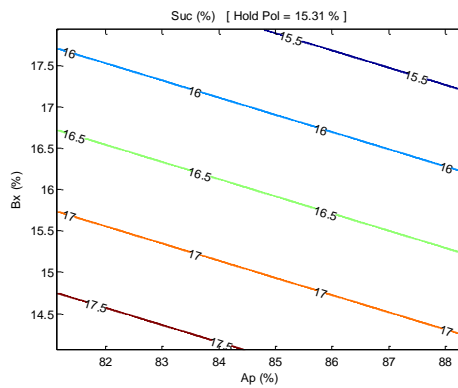

Predicting equation (6). Contour plot between apparent purity and brix at polarization= 15.31%.

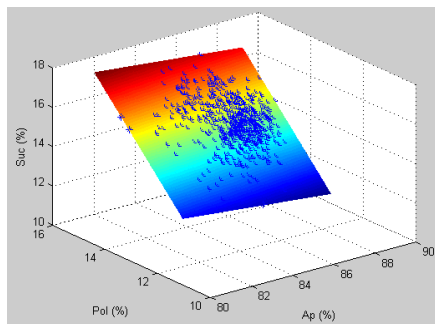

Predicting equation (6). 3D response surface of the detected data (apparent purity, polarization and sucrose content ) at brix = 14.07%.

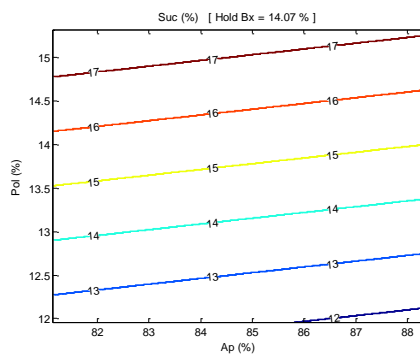

Predicting equation (6). Contour plot between apparent purity and polarization at brix = 14.07%.

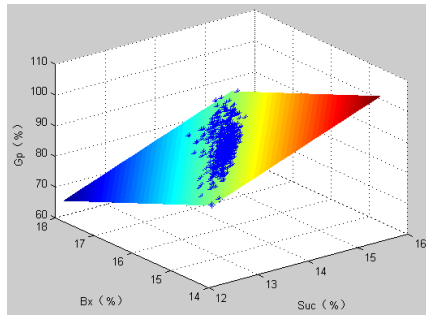

Predicting equation (7). 3D response surface of the detected data (sucrose content, brix and gravity purity).

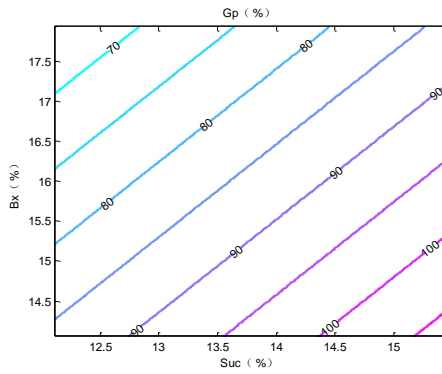

Predicting equation (7). Contour plot between sucrose content and brix.

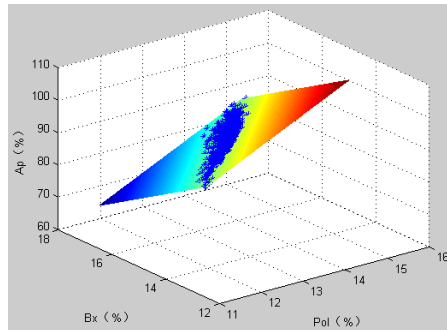

Predicting equation (8). 3D response surface of the detected data (polarization, brix and apparent purity).

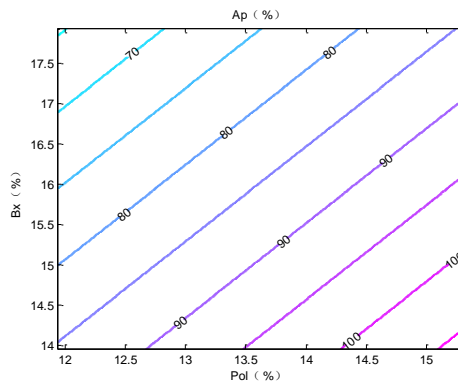

Predicting equation (8). Contour plot between polarization and brix.
